# Supplementary material for: A hydroxyl-assisted ionic bifunctional hyper-crosslinked polymer as an efficient and recyclable heterogeneous catalyst for CO 2 cycloaddition
Source: Royal Society of Chemistry journal article supplement (doi:10.1039/d5ta08802j), 2026-01-01

## Supporting Information

### Hydroxyl-assisted ionic bifunctional hyper-crosslinked polymer as an efficient and recyclable heterogeneous catalyst for CO<sub>2</sub> cycloaddition

Jingjing Liu,<sup>‡a</sup> Shulei Xiang,<sup>‡a</sup> Dexuan Xiang,<sup>a,c\*</sup> Jingao Wu,<sup>a,c</sup> Hongliang Xu,<sup>b</sup> Gui Chen,<sup>a</sup> Zaixing Zhang<sup>a,c</sup>, Feipeng Yuan and Yuejun Ouyang<sup>a,c</sup>

<sup>a</sup> *College of Chemistry and Materials, Huaihua University, Huaihua 418000, P. R. China*

<sup>b</sup> *Institute of Functional Material Chemistry, Department of Chemistry, Northeast Normal University, Changchun, 130024, People's Republic of China.*

<sup>c</sup> *Key Laboratory of Preparation and Application of Environmentally Friendly Functional Materials, Huaihua University, Huaihua 418000, P. R. China*

**\* Corresponding author**

Tel.: +86-745-2851014.

<sup>‡</sup>*Jingjing Liu and Shulei Xiang contributed equally to this work.*

*E-mail address:* dexuanxiang@126.com (D.Xiang)

## **1. Experimental**

### **1.1 Reagents**

The macroporous chloromethylated polystyrene (CMPs), with a chlorine content of 17.3% (w/w), was obtained from Langfang Chemical Co. Ltd., China. Reagents such as 4-hydroxypyridine (AR, 97%), potassium carbonate (AR, 98%), iron chloride ( $\text{FeCl}_3$ , AR, 99.9%), dimethoxymethane (FDA, AR, 98.0%), dimethylformamide (DMF, AR, 98.0%), and epoxides (AR) were acquired from Shanghai Aladdin Biochemical Technology Co., Ltd., China. Additionally, 1,2-dichloroethane (AR, 99.5%) was sourced from Chengdu Jinshan Chemical Co., Ltd., China. Unless otherwise specified, all other chemicals were purchased commercially and used directly without additional purification.

### **1.2 Characterizations**

The XPS spectra were measured with a Thermo ESCALAB 250XI under the stimulation of Al Ka radiation. For Fourier transform infrared (FT-IR) spectra, they were obtained from 400  $\text{cm}^{-1}$  to 4000  $\text{cm}^{-1}$  by means of the FT-IR Bruker (EQUINOX 55) spectrometer. The Micromeritics ASAP 2460 surface area and porosity analyzer was utilized to record the specific surface area ( $S_{\text{BET}}$ ) and pore size distributions via the  $\text{N}_2$  adsorption-desorption isotherms. The TGA was executed on a DSC Q2000 within an  $\text{N}_2$  gas atmosphere, with the temperature ranging from ambient to 800  $^{\circ}\text{C}$ . The morphology of the resins was examined by SEM (Zeiss, Sigma

HD) and TEM (FEI Tecnai G20). The XRD spectra were collected using a Rigaku Ultima IV X-ray diffractometer with Cu K $\alpha$  radiation (40 kV and 40 mA). The elemental analyzer (UNICUBE) was employed to test the C/N/H/O contents, while the Cl contents were determined through the Volhard method. The products underwent purification by column chromatography. The  $^1\text{H}$  NMR spectra were detected at 400 MHz, with TMS serving as the internal standard, on a Quantum-I Plus 400 MHz spectrometer.

### 1.3 Computational methods

The first-principles calculations were performed using the Vienna ab initio simulation package (VASP)<sup>[1, 2]</sup> based on density-functional theory (DFT) with the projector augmented wave (PAW) method<sup>[3]</sup>. The generalized gradient approximation (GGA-PBE) functional of Perdew-Burke-Ernzerhoff (PBE)<sup>[4, 5]</sup> was utilized to define the exchange-correlation interaction. Spin calculations were adopted. A cutoff energy of 450 eV was applied to the plane-wave basis. Structural relaxation was attained using the conjugate gradient (CG) method, iterated until the total energy error was below  $10^{-5}$  eV, and the force on each atom was less than 0.02 eV/Å. The Brillouin zone was sampled using a single gamma k-point grid. To optimize the minimum-energy path (MEP), the climbing image nudged elastic band (CINEB) method<sup>1</sup> was employed to pinpoint the transition state, imposing a force convergence criterion on each atom of 0.03 eV/ Å.

## References:

- [1] KRESSE G, FURTHMÜLLER J. Efficient iterative schemes for ab initio total-energy calculations using a plane-wave basis set [J]. Physical Review B, 1996, 54(16): 11169-11186.
- [2] KRESSE G, HAFNER J. Ab initio molecular-dynamics simulation of the liquid-metal--amorphous-semiconductor transition in germanium [J]. Physical Review B, 1994, 49(20): 14251-14269.
- [3] BLÖCHL P E. Projector augmented-wave method [J]. Physical Review B, 1994, 50(24): 17953-17979.
- [4] PERDEW J P, BURKE K, ERNZERHOF M. Generalized gradient approximation made simple [J]. Physical review letters, 1996, 77(18): 3865.
- [5] PERDEW J P, BURKE K, ERNZERHOF M. Erratum: Generalized gradient approximation made simple (Physical Review Letters (1996) 77 (3865)) [J]. Physical Review Letters, 1997, 78(8): 1396.

### 1.4 Scheme S1. Synthesis of CMPs-HQ

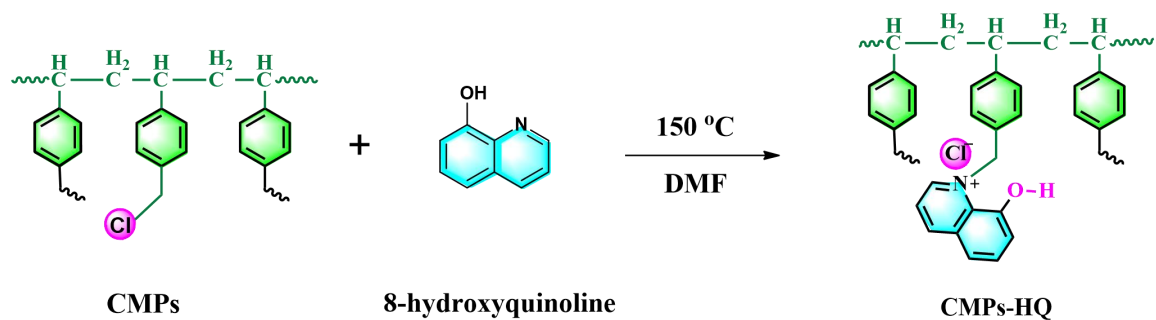

### 1.5 Scheme S2. Synthesis of HCPs-HQ-Fe

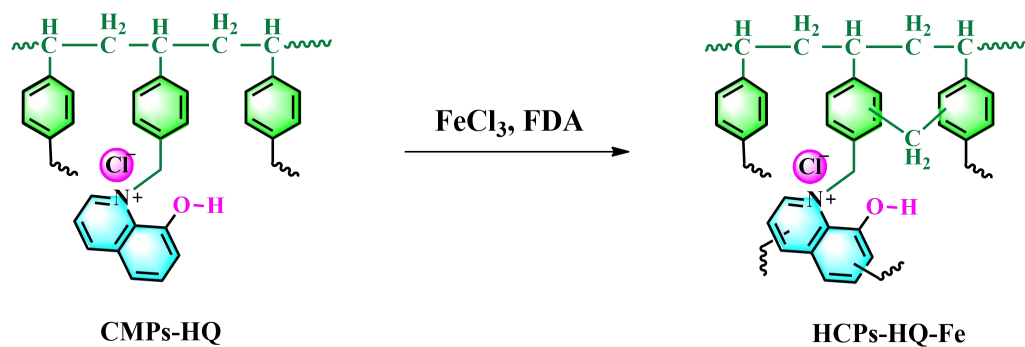

### 1.6 Scheme S3. Synthesis of HCPs-HQ-Fe'

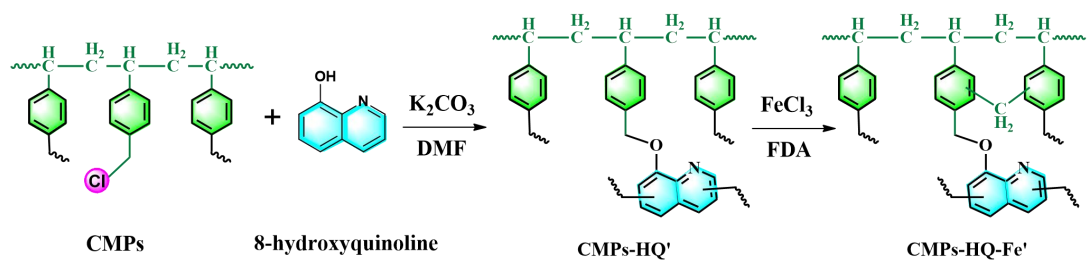

### 1.7 Scheme S4. Synthesis of HCPs-Q-Fe

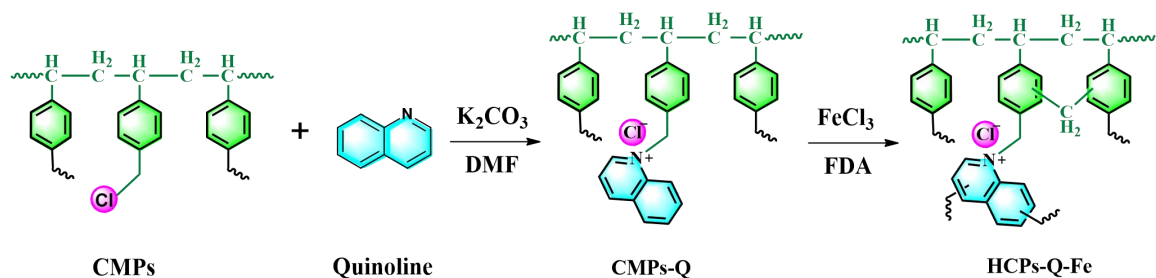

## 2. Catalyst characterizations

### 2.1 Fig. S1. TGA curves of samples

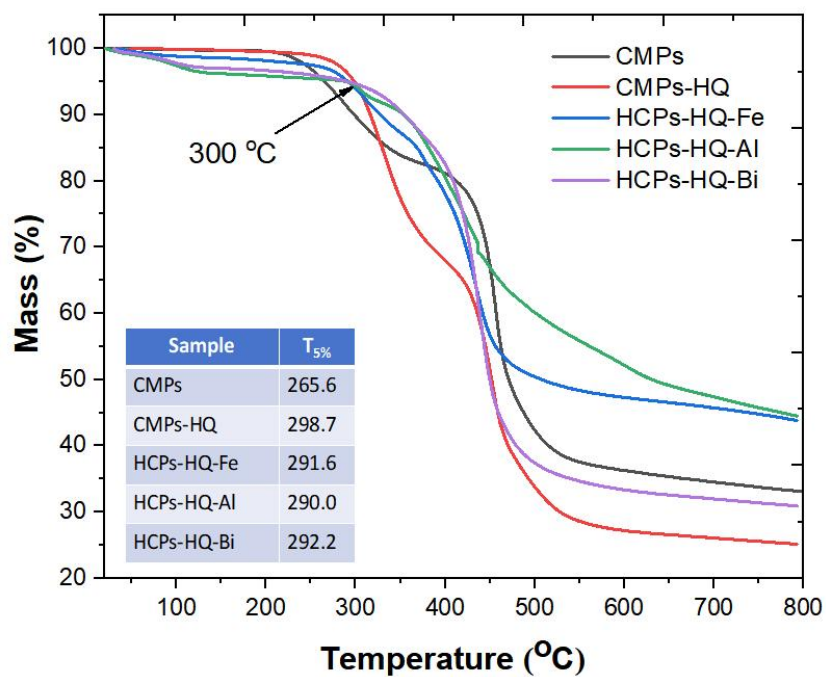

### 2.2 Fig. S2. XRD patterns of CMPs-HQ and HCPs-HQ

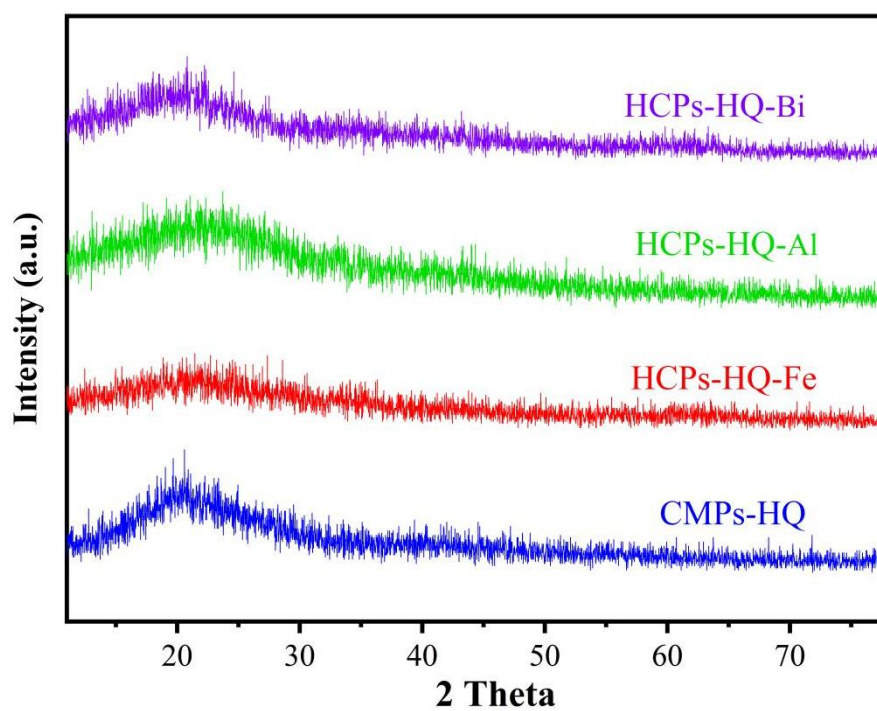

**2.3 Fig. S3.** SEM image of HCPs-HQ-Al (A and B) and HCPs-HQ-Bi (C and D)

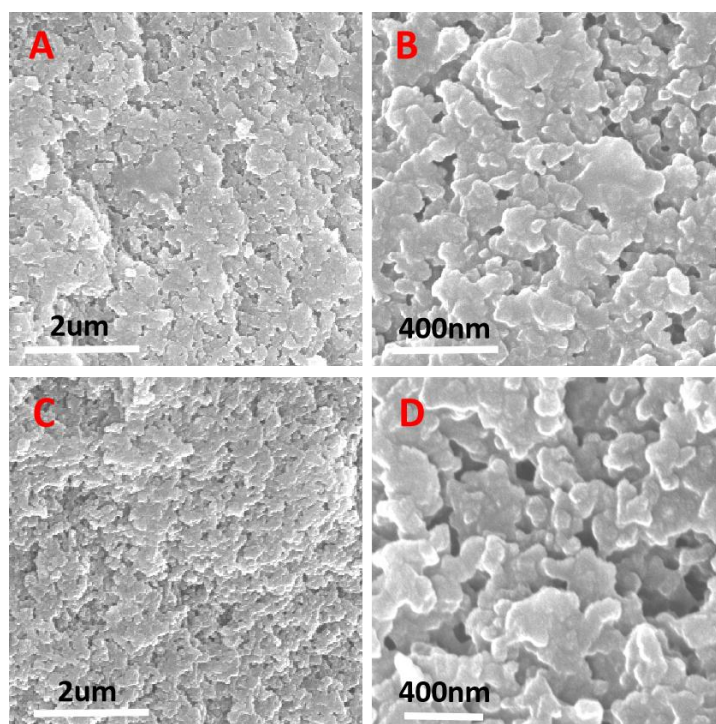

**2.4 Fig. S4.** TEM image of HCPs-HQ-Al (A and B) and HCPs-HQ-Bi (C and D)

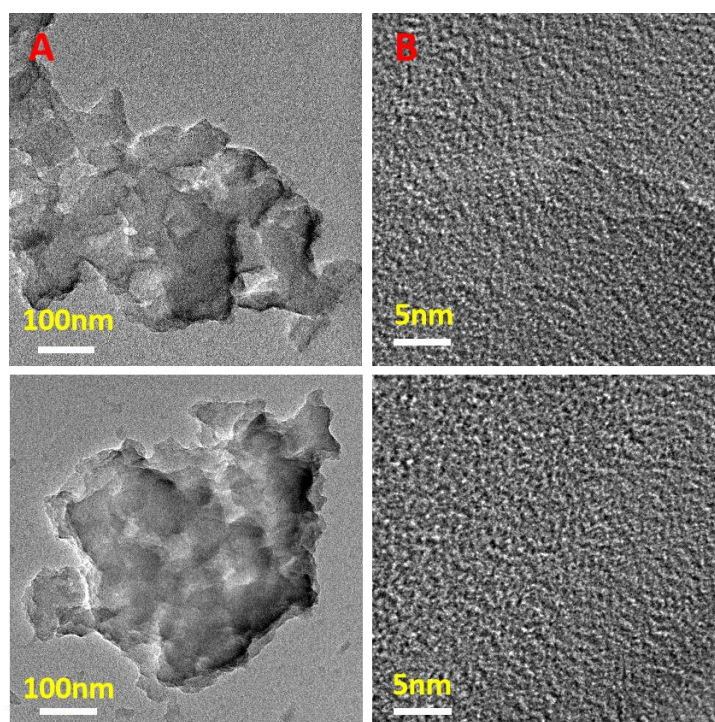



**2.5. Fig. S5.** SEM-Mapping images of HCPs-HQ-Al : Carbon ( grey), Nitrogen (blue), Oxygen (red), and Chlorine green).

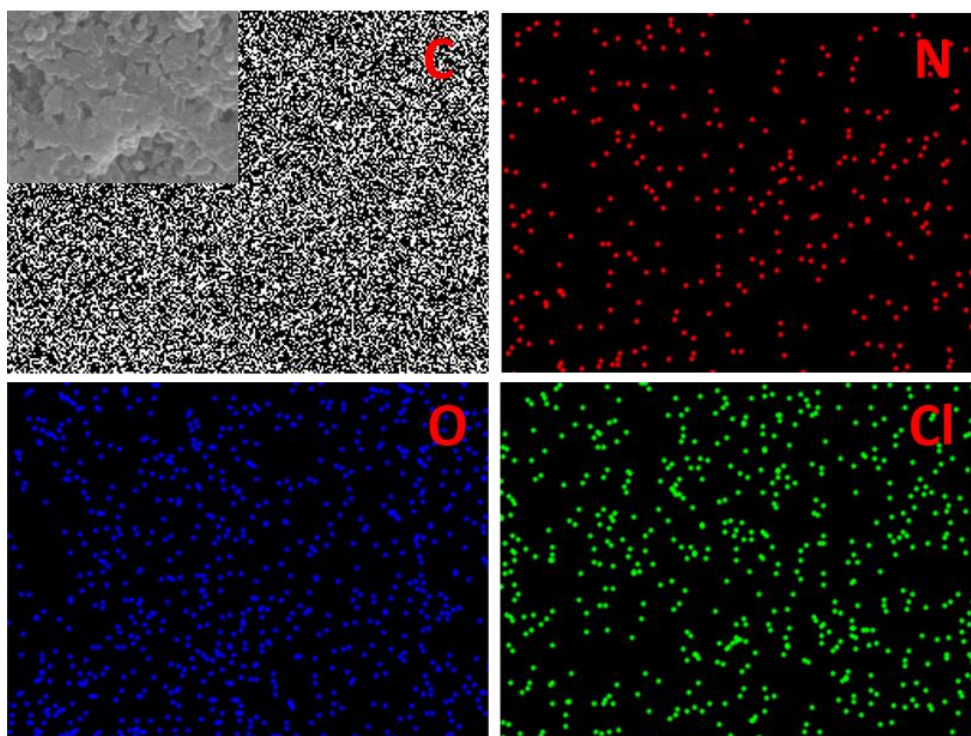

**2.6 Fig. S6.** SEM-Mapping images of HCPs-HQ-Bi : Carbon ( grey), Nitrogen (blue), Oxygen (red), and Chlorine green).

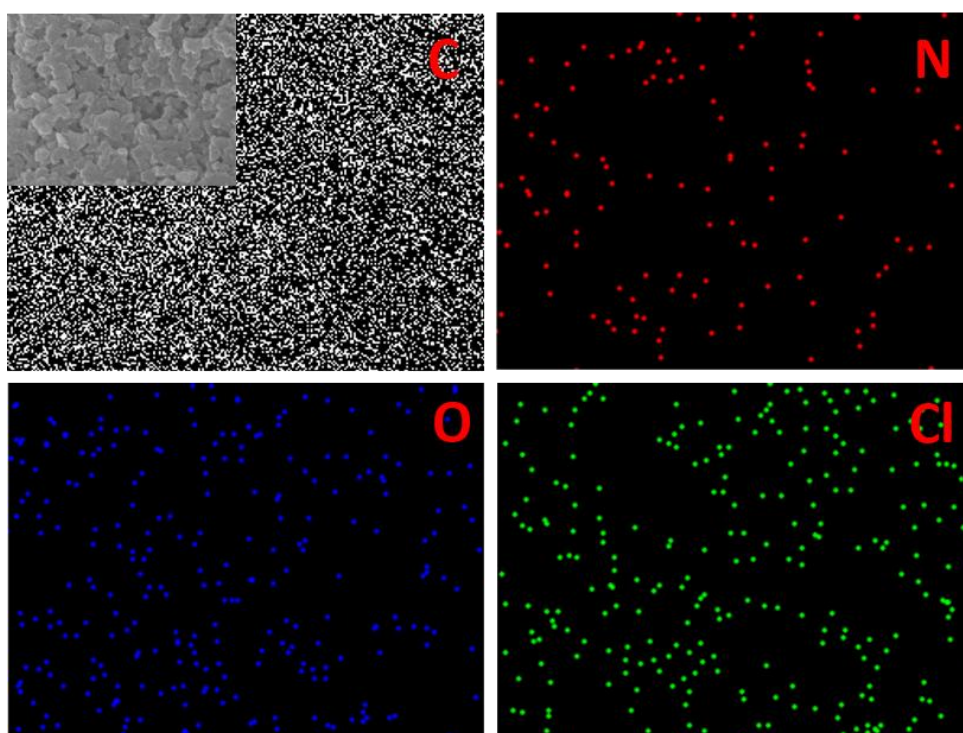



### 3. Application in the CO<sub>2</sub>-epoxide cycloaddition reaction

Table S1 Optimization of the cycloaddition condition <sup>a</sup>

| 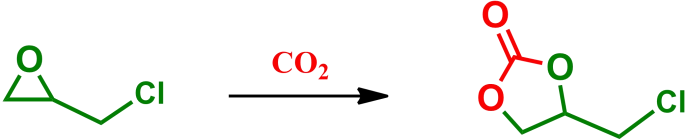 |             |        |          |          |      |                    |
|------------------------------------------------------------------------------------|-------------|--------|----------|----------|------|--------------------|
| Entry                                                                              | Catalyst    | Dosage | Pressure | Temp. °C | Time | Yield <sup>b</sup> |
|                                                                                    |             | g      | MPa      |          | h    | %                  |
| 1                                                                                  | HCPs-HQ-Fe  | 0.1    | 1.0      | 80       | 10   | 56                 |
| 2                                                                                  | HCPs-HQ-Al  | 0.1    | 1.0      | 80       | 10   | 48                 |
| 3                                                                                  | HCPs-HQ-Bi  | 0.1    | 1.0      | 80       | 10   | 43                 |
| 4                                                                                  | HCPs-HQ-Fe  | 0.1    | 1.0      | 60       | 10   | 18                 |
| 5                                                                                  | HCPs-HQ-Fe  | 0.1    | 1.0      | 100      | 10   | 86                 |
| 6                                                                                  | HCPs-HQ-Fe  | 0.1    | 1.0      | 120      | 10   | 96                 |
| 7                                                                                  | HCPs-HQ-Fe  | 0.1    | 1.0      | 100      | 20   | 99                 |
| 8                                                                                  | HCPs-HQ-Fe  | 0.1    | 0.1      | 100      | 20   | 99                 |
| 9                                                                                  | HCPs-HQ-Fe  | 0.02   | 0.1      | 100      | 20   | 99                 |
| 10                                                                                 | HCPs-HQ-Fe  | 0.01   | 0.1      | 100      | 20   | 90                 |
| 11                                                                                 | HCPs-HQ-Al  | 0.02   | 0.1      | 100      | 20   | 93                 |
| 12                                                                                 | HCPs-HQ-Bi  | 0.02   | 0.1      | 100      | 20   | 88                 |
| 13                                                                                 | CMPs-HQ     | 0.02   | 0.1      | 100      | 20   | 26                 |
| 14                                                                                 | CMPs        | 0.02   | 0.1      | 100      | 20   | 0                  |
| 15                                                                                 | HCPs-Q-Fe   | 0.02   | 0.1      | 100      | 20   | 23                 |
| 16                                                                                 | HCPs-HQ-Fe' | 0.02   | 0.1      | 100      | 20   | 4                  |

<sup>a</sup> Reaction conditions: epichlorohydrin (3.0 g). <sup>b</sup> The yield is characterized by <sup>1</sup>H NMR.

## 4. Catalyst recycling

4.1 Fig. S7 FT-IR spectra of recycled HCPs-HQ-Fe.

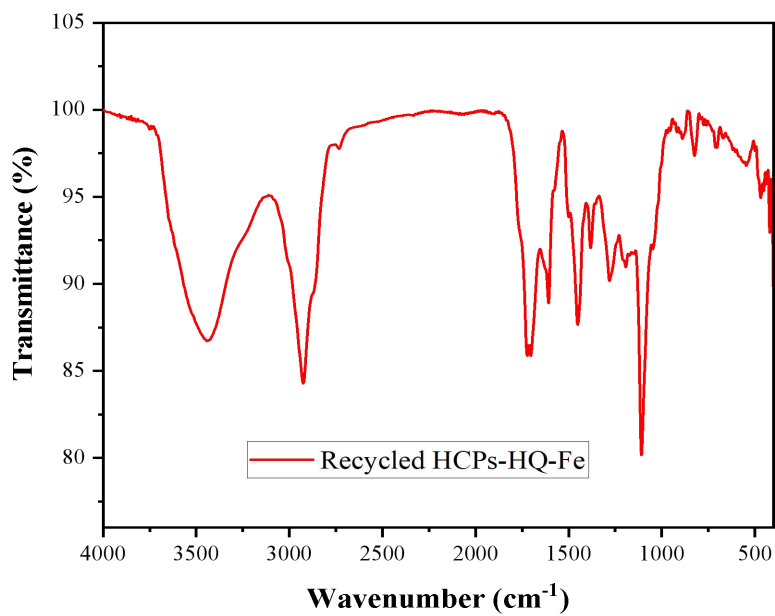

4.2 Fig. S8 SEM images (A and B) and TEM images (A and B) of recycled HCPs-HQ-Fe.

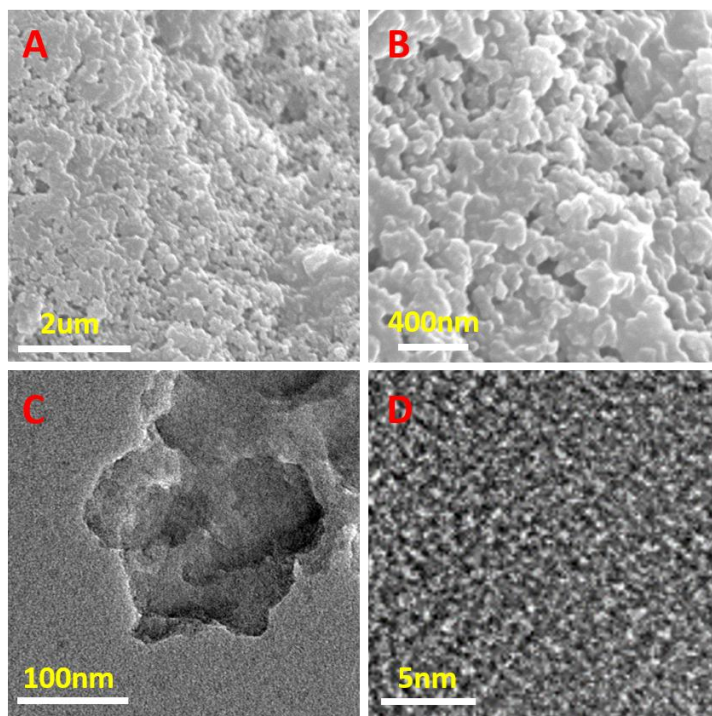

**4.3 Fig. S9.** SEM-Mapping images of recycled HCPs-HQ-Fe.

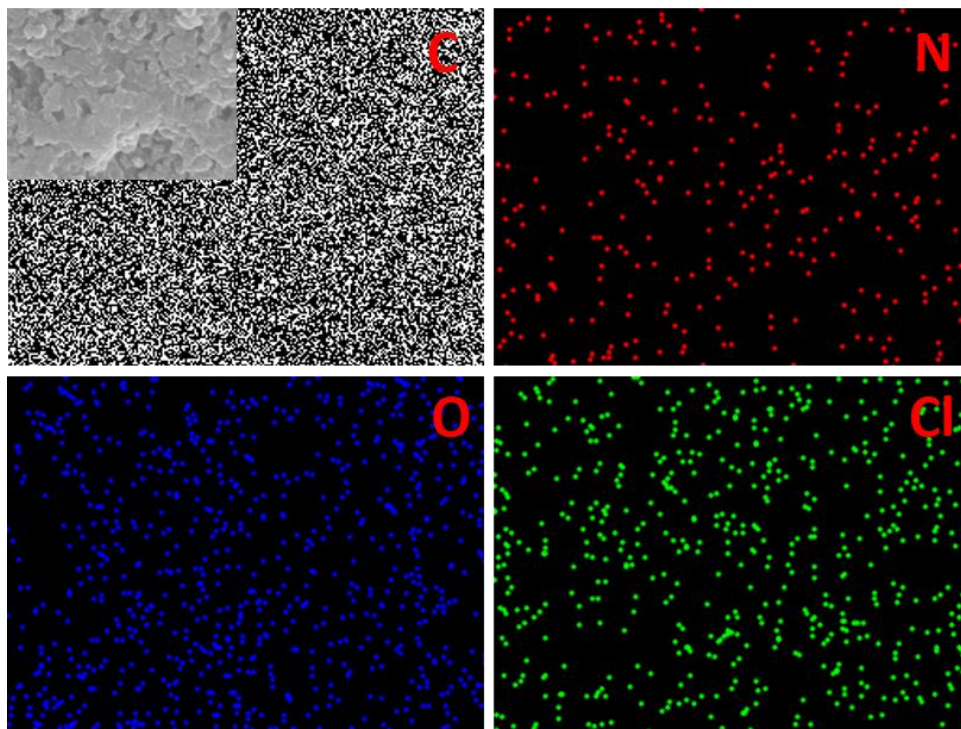

**5. FT-IR spectra of recycled HCPs-HQ-Fe' and HCPs-Q-Fe.**

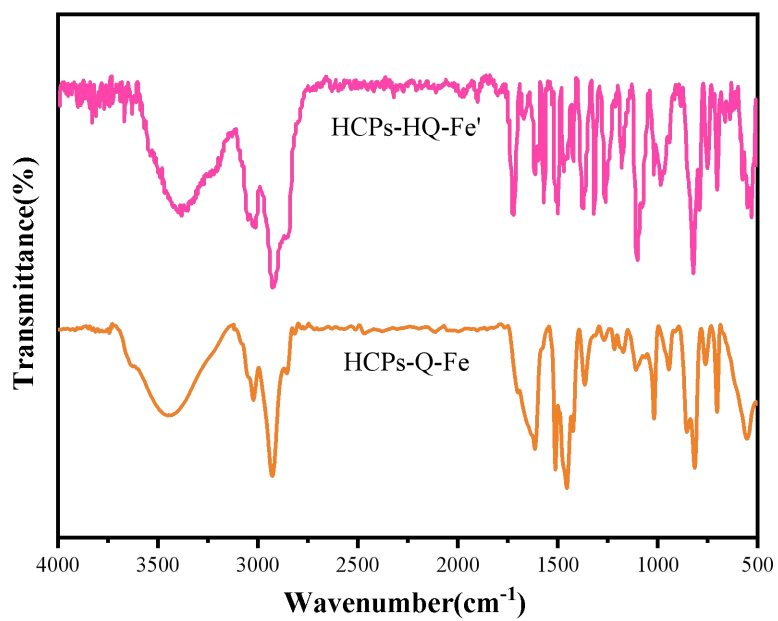

**Fig. S10** FT-IR spectra of recycled HCPs-HQ-Fe' and HCPs-Q-Fe.

**6. Table S2.** Elemental analysis of HCPs-HQ-Fe and recycled HCPs-HQ-Fe

| Sample                 | C (%) | H (%) | N (%) | Cl (%) |
|------------------------|-------|-------|-------|--------|
| HCPs-HQ-Fe             | 76.58 | 6.32  | 1.11  | 3.16   |
| Recycled<br>HCPs-HQ-Fe | 76.25 | 6.19  | 1.08  | 3.04   |

## 7. Copies of $^1\text{H}$ NMR spectra for compounds 2

**Compound 2a:** 4-(chloromethyl)-1,3-dioxolan-2-one.

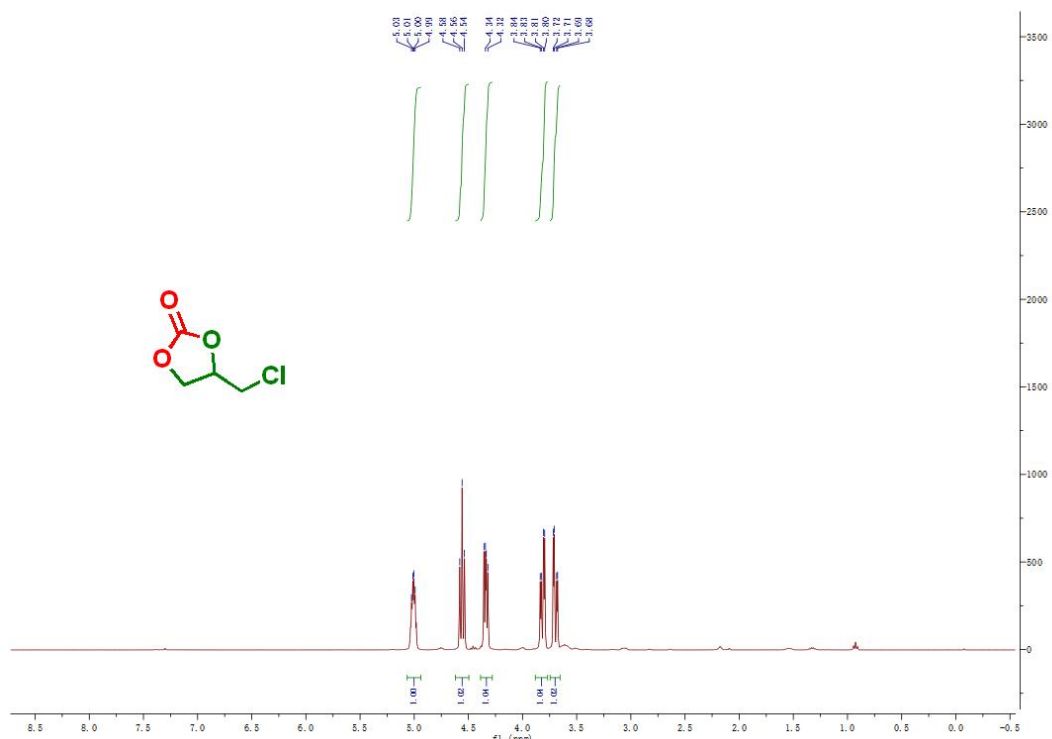

**Compound 2b:** 4-(bromomethyl)-1,3-dioxolan-2-one

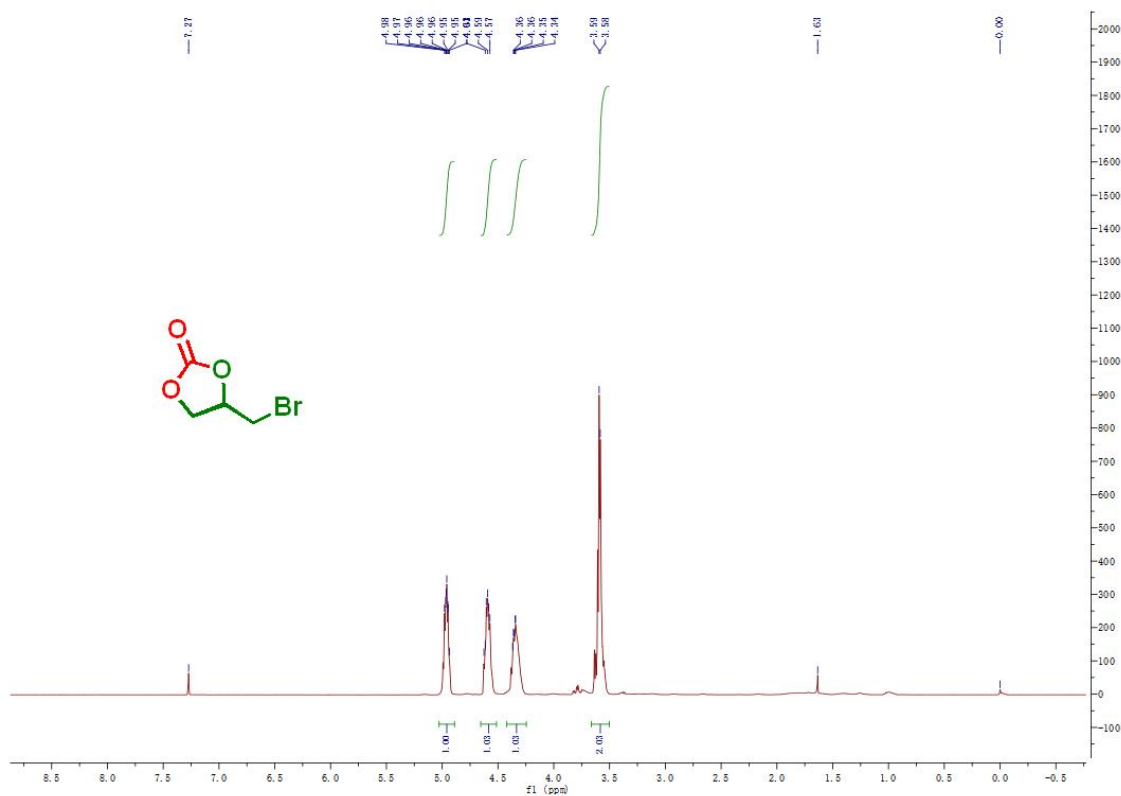



**Compound 2c: 4-methyl-1,3-dioxolan-2-one**

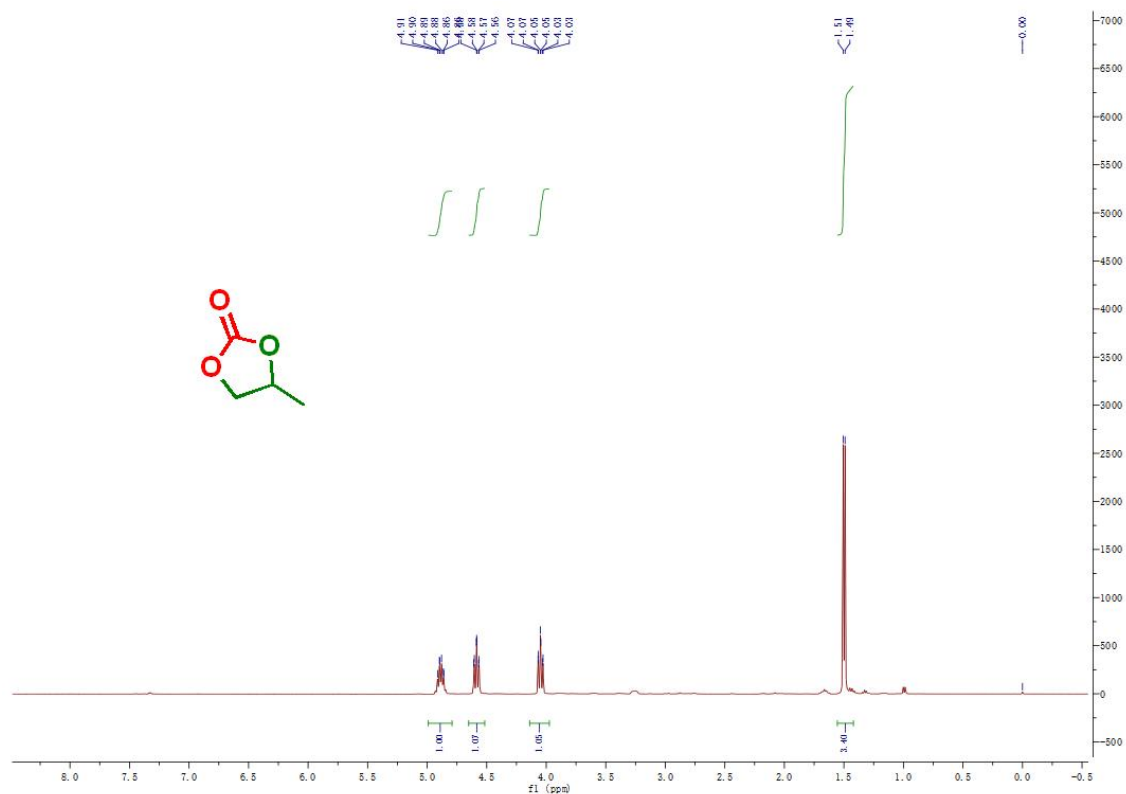

**Compound 2d: 4-ethyl-1,3-dioxolan-2-one**

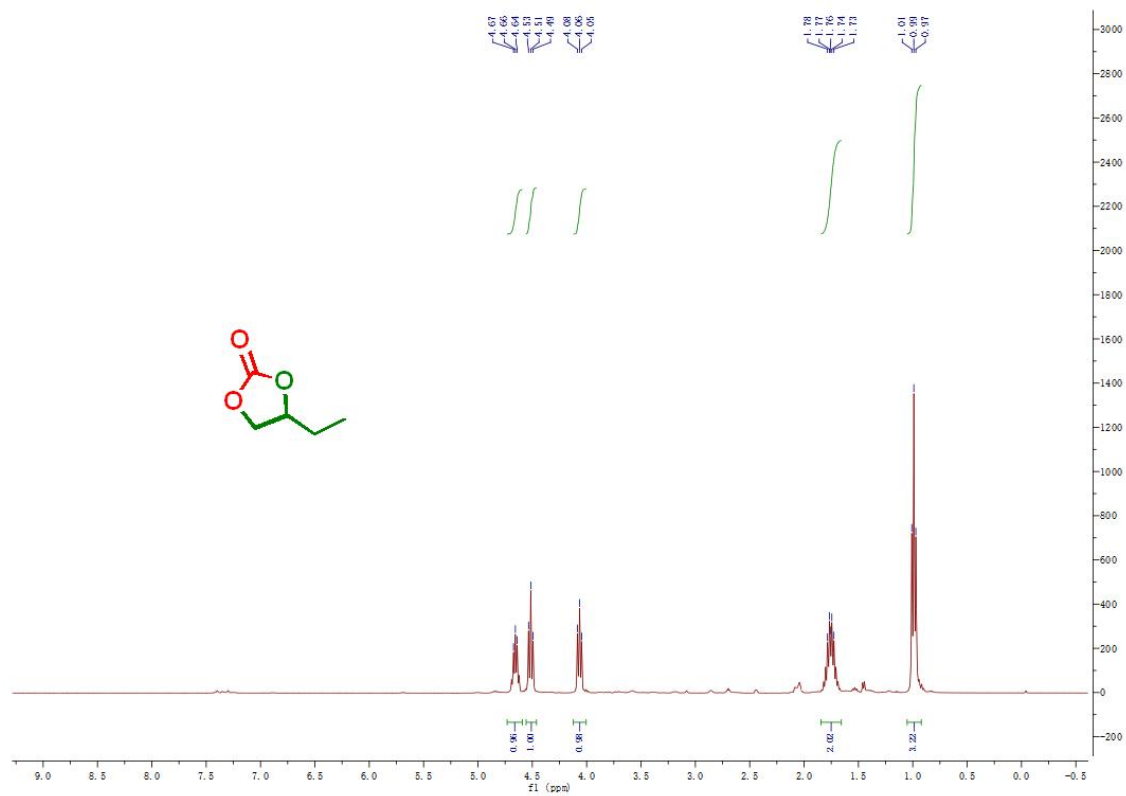

## Compound 2e: 4-phenyl-1,3-dioxolan-2-one

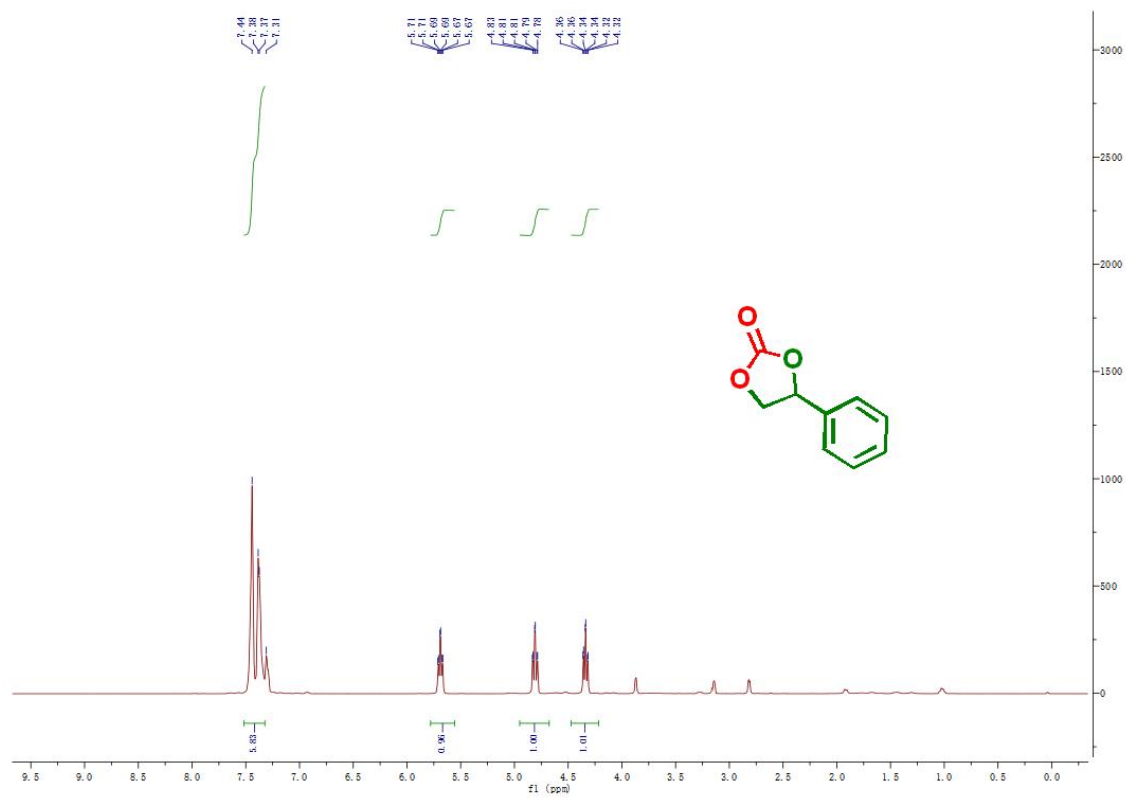

## Compound 2f: 4-(phenoxyethyl)-1,3-dioxolan-2-one

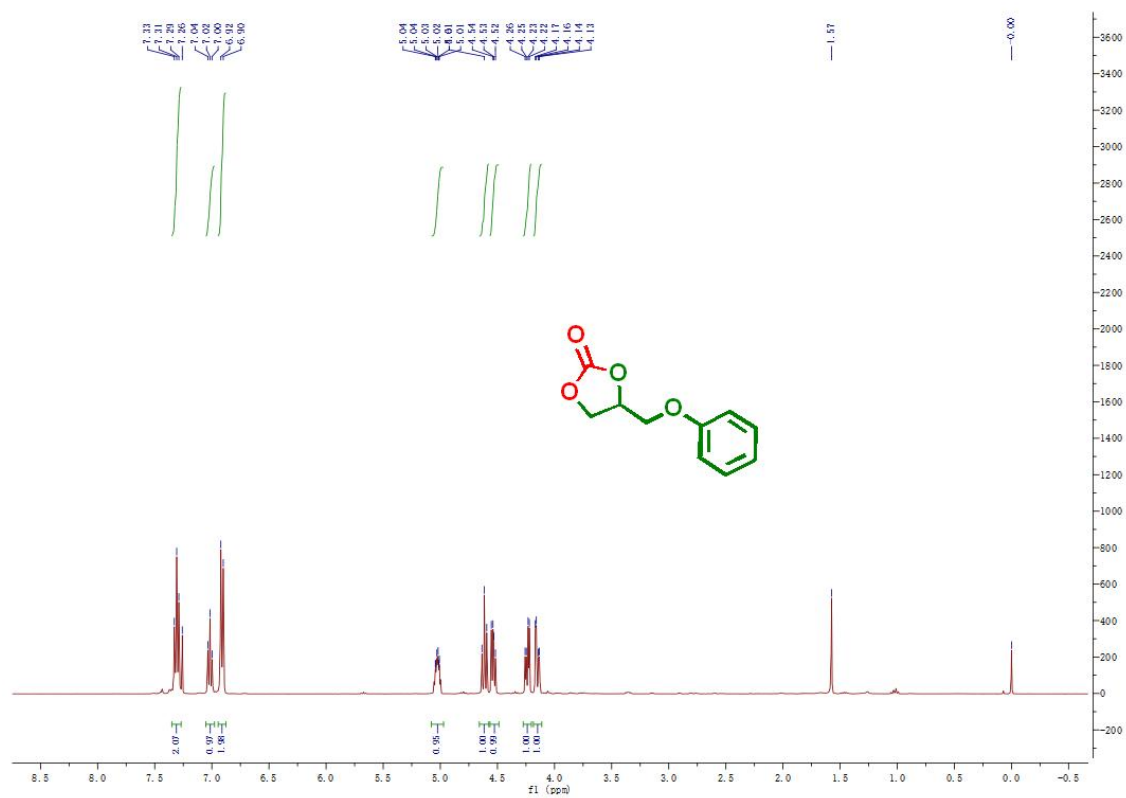

Supplement: d5ta08802j1.pdf [file d5ta08802j1.pdf]
